# Supplementary material for: Cancer Genomic Profiling Identified Dihydropyrimidine Dehydrogenase Deficiency in Bladder Cancer Promotes Vulnerability to Gemcitabine
Source: Research Square preprint supplement (doi:10.21203/rs.3.rs-1322840/v1), 2022-02-15
Supplement: Supplementary file 1 [file 0a95e19b89da0539dbcaa5dd.pdf]

Table 1. Clinicopathological information of patients

| Variables                               | <i>DPYD</i> expression in patients treated with gemcitabine |              |         | <i>DPYD</i> expression in patients treated without gemcitabine |              |         |
|-----------------------------------------|-------------------------------------------------------------|--------------|---------|----------------------------------------------------------------|--------------|---------|
|                                         | High (n = 42)                                               | Low (n = 42) | P-value | High (n = 27)                                                  | Low (n = 27) | P-value |
| Median age, years (interquartile range) | 66 (57–72)                                                  | 61.8 (57–73) | 0.71    | 57 (50–66)                                                     | 56 (53–61)   | 0.80    |
| Gender, n(%)                            |                                                             |              |         |                                                                |              |         |
| Male                                    | 28 (66.7%)                                                  | 34 (81.0%)   | 0.21    | 19 (70.3%)                                                     | 20 (74.1%)   | 0.76    |
| Female                                  | 14 (33.3%)                                                  | 8 (19.0%)    |         | 8 (29.7%)                                                      | 7 (25.9%)    |         |
| Clinical T-stage, n(%)                  |                                                             |              |         |                                                                |              |         |
| cT2                                     | 17 (40.5%)                                                  | 24 (57.1%)   | 0.34    | 5 (18.5%)                                                      | 11 (40.7%)   | 0.11    |
| cT3                                     | 17 (40.5%)                                                  | 13 (30.9%)   |         | 16 (59.3%)                                                     | 9 (33.3%)    |         |
| cT4                                     | 8 (19.0%)                                                   | 5 (11.9%)    |         | 6 (22.2%)                                                      | 7 (25.9%)    |         |
| Pathological T-stage, n(%)              |                                                             |              |         |                                                                |              |         |
| pT0                                     | 14 (33.3%)                                                  | 20 (47.6%)   | 0.04*   | 12 (44.4%)                                                     | 11 (40.7%)   | 0.38    |
| pT1                                     | 3 (7.1%)                                                    | 2 (4.8%)     |         | 2 (7.4%)                                                       | 2 (7.4%)     |         |
| pT2                                     | 6 (14.3%)                                                   | 11 (26.2%)   |         | 1 (3.7%)                                                       | 7 (25.9%)    |         |
| pT3                                     | 14 (33.3%)                                                  | 5 (11.9%)    |         | 4 (14.8%)                                                      | 5 (18.5%)    |         |
| pT4                                     | 5 (11.9%)                                                   | 4 (9.5%)     |         | 6 (22.2%)                                                      | 2 (7.4%)     |         |
| NA                                      | 0 (0%)                                                      | 0 (0%)       |         | 2 (7.4%)                                                       | 0 (0%)       |         |
| Pathological N-stage, n(%)              |                                                             |              |         |                                                                |              |         |
| pN0                                     | 33 (78.6%)                                                  | 31 (73.8%)   | 0.26    | 17 (63.0%)                                                     | 12 (44.4%)   | 1.00    |
| pN1–3                                   | 5 (11.9%)                                                   | 10 (23.8%)   |         | 0 (0%)                                                         | 0 (0%)       |         |
| NA                                      | 4 (9.5%)                                                    | 1 (2.4%)     |         | 10 (37.0%)                                                     | 15 (55.6%)   |         |
| NAC regimen, n(%)                       |                                                             |              |         |                                                                |              |         |
| GC                                      | 37 (88.1%)                                                  | 36 (85.7%)   | 0.75    | 0 (0%)                                                         | 0 (0%)       | 1.00    |
| GCarbo                                  | 5 (11.9%)                                                   | 6 (14.3%)    |         | 0 (0%)                                                         | 0 (0%)       |         |
| MVAC                                    | 0 (0%)                                                      | 0 (0%)       |         | 27 (100%)                                                      | 27 (100%)    |         |
| Recurrence, n(%)                        |                                                             |              |         |                                                                |              |         |
| Absence                                 | 26 (61.9%)                                                  | 30 (71.4%)   | 0.49    | 17 (63.0%)                                                     | 16 (59.3%)   | 0.57    |
| Presence                                | 16 (38.1%)                                                  | 12 (28.6%)   |         | 8 (29.6%)                                                      | 11 (40.7%)   |         |
| NA                                      | 0 (0%)                                                      | 0 (0%)       |         | 2 (7.4%)                                                       | 0 (0%)       |         |
| Survival, n(%)                          |                                                             |              |         |                                                                |              |         |
| Alive                                   | 26 (61.9%)                                                  | 35 (83.3%)   | 0.049*  | 20 (74.1%)                                                     | 18 (66.7%)   | 0.77    |
| Death                                   | 16 (38.1%)                                                  | 7 (16.7%)    |         | 7 (25.9%)                                                      | 9 (33.3%)    |         |

\*Statistically significant.

NA, not available; NAC, neoadjuvant chemotherapy; GC, gemcitabine/cisplatin; Gcarbo, gemcitabine/carboplatin; MVAC, methotrexate/vinblastine/doxorubicin/cisplatin
